# Supplementary material for: Amorphous Fe–O–P electro(pre)catalysts for energy-efficient H2 production coupled with ethylene glycol oxidation
Source: Royal Society of Chemistry journal article supplement (doi:10.1039/d4cc05422a), 2024-01-01
Supplement: d4cc05422a1.pdf [file d4cc05422a1.pdf]

## Electronic Supplementary Information

### **Amorphous Fe-O-P electro(pre)catalysts for energy-efficient H<sub>2</sub> production coupled with ethylene glycol oxidation**

Feifei Yuan,<sup>a, c</sup> Xiaoli Chen,<sup>a</sup> Wenhui Yang,<sup>a</sup> Wanting Wu,<sup>a</sup> Manjie Zheng,<sup>a</sup> Jun Xu,<sup>\*b</sup> Nan Yu,<sup>\*c</sup> and Liyong Chen<sup>\*a, d</sup>

a. Department of Pharmaceutical Engineering, Bengbu Medical University, Bengbu, 233030, China. E-mail: lychen@bbmc.edu.cn.

b. Department of Physics, Research Institute for Biomimetics and Soft Matter, Fujian Provincial Key Laboratory for Soft Functional Materials, Xiamen University, Xiamen, 361005 China. E-mail: xujun@xmu.edu.cn.

c. Anhui Laboratory of Molecule-Based Materials, College of Chemistry and Materials Science, Anhui Normal University, Wuhu, 241002, China. E-mail: yn2009@ahnu.edu.cn.

d. Anhui Provincial Key Laboratory of Tumor Evolution and Intelligent Diagnosis and Treatment, Bengbu medical university.

# 1. Experimental section

## 1.1 Chemicals and Materials

Fumaric acid ( $C_4H_4O_4$ , AR, 99.5%), iron nitrate nonahydrate ( $Fe(NO_3)_3 \cdot 9H_2O$ , AR, 98.5%), sodium hypophosphite monohydrate ( $NaH_2PO_2 \cdot H_2O$ , AR, 99%), potassium hydroxide (KOH, AR, 95%), ethylene glycol ( $C_2H_6O_2$ , EG, GC, >99%), platinum on carbon (20% Pt/C) and ruthenium dioxide ( $RuO_2$ ) were purchased from Macklin Biochemical Co., Ltd. Anhydrous ethanol ( $CH_3CH_2OH$ , AR, 99.7%), N, N-Dimethylformamide ( $C_3H_7NO$ , DMF, 99%) were purchased from Sinopharm Group Chemical Reagent Co., Ltd. All reagents and chemicals were used without further purification. Deionized water was used throughout the experiments.

## 1.2 Synthesis of spindle-shaped Fe-MOF (MIL-88A) microstructures

The spindle-shaped Fe-MOF (MIL-88A) microstructures were prepared following a previously reported method with minor modifications. Typically, 139.6 mg (1.20 mmol) of  $C_4H_4O_4$  and 262.6 mg (0.65 mmol) of  $Fe(NO_3)_3 \cdot 9H_2O$  were dissolved in 25 mL of deionized water under magnetic stirring to form a homogeneous solution. After continuously stirring for 30 min at room temperature, the solution was transferred into a 50 mL Teflon-lined stainless steel autoclave and heated at 110 °C for 6 h. Subsequently, the system was allowed to cool naturally to room temperature. The saffron-yellow precipitates were washed several times with deionized water and absolute ethanol to remove impurities, and dried under vacuum at 60 °C for 12 h.

## 1.3 Synthesis of hollow spindle-shaped amorphous Fe-O-P microstructures

In a typical experiment, hollow spindle-shaped amorphous Fe-O-P microstructures were synthesized as follows: 50 mg of the as-prepared Fe-MOF was added to a pre-prepared  $NaH_2PO_2 \cdot H_2O$  (1.5 mmol, 159 mg) in 10 mL of deionized water in a single neck flask. Subsequently, 5 mL of DMF was added into the mixture. The resulting system was ultrasonically treated for 15 min to form a homogeneous suspension. The suspension was then stirred slowly at a reflux temperature of 120 °C for 1 h. Afterward, the saffron-yellow precipitates were collected, washed several times with deionized water and absolute ethanol to remove impurities, and finally dried under vacuum at 60 °C for 12 h. The hollow spindle-shaped Fe-O-P microstructures were thus prepared.

## 1.4 Characterization

X-ray Diffraction Spectrometry (XRD, Bruker D8 ADVANCE) with Cu K $\alpha$  radiation was employed for phase analyses of the products. Field emission scanning electron microscopy (FE-SEM) images were obtained using a Hitachi Regulus 8100. Transmission electron microscopy (TEM) images were obtained using a Hitachi HT7700. Fourier transform infrared (FT-IR) spectra were recorded on a Thermo Scientific NICOLET iS50 spectrometer. High-resolution TEM (HRTEM) images, selected area electron diffraction (SAED) patterns, and elemental mapping images were conducted with aberration-corrected high-angle annular dark-field scanning transmission electron microscopy (HAADF-STEM) on an FEI tecnai F20. X-ray

photoelectron spectroscopy (XPS) was conducted using a Thermo Fisher Scientific Escalab 250Xi spectrometer.

### 1.6 Preparation of working electrodes

To prepare the electrode modified by various samples, a piece of Ni foam (NF,  $1 \times 1 \text{ cm}^2$ ) was ultrasonically washed in ethanol and deionized water for 30 min each. Simultaneously, various electrocatalyst inks were prepared by dispersing 5.0 mg of electrocatalyst powder into a mixed solvent, containing 50  $\mu\text{L}$  of Nafion solution (5 wt.%), 450  $\mu\text{L}$  of ethanol, and 500  $\mu\text{L}$  of deionized water under the ultrasonic assistance. After ultrasonic treatment for another 30 min, 500  $\mu\text{L}$  of electrocatalyst ink was dropped on the NF, achieving an electrocatalyst loading of  $\sim 2.5 \text{ mg cm}^{-2}$ . The resulting working electrodes were dried under vacuum at  $60 \text{ }^\circ\text{C}$  for 12 h. In addition, the NF-supported  $\text{RuO}_2$  and the NF-supported Pt/C electrodes were prepared using a similar method.

### 1.7 Electrochemical measurements

All electrochemical measurements were performed on a CHI 760E electrochemical workstation (CH Instruments, Inc., Shanghai, China) with a standard three-electrode system. The system consisted of NF-supported catalysts as the working electrode, a platinum wire as the counter electrode, and an Hg/HgO electrode as the reference electrode. In all measurements, the reference electrode was calibrated to the reversible hydrogen electrode (RHE) scale in 1.0 M KOH according to the following equation:  $E(\text{RHE}) = E(\text{Hg}/\text{HgO}) + 0.927 \text{ V}$ . Linear sweep voltammetry (LSV) was conducted in 1.0 M KOH solution at a scan rate of  $5.0 \text{ mV s}^{-1}$  with 90% iR-compensation unless otherwise mentioned. The electrochemical impedance spectroscopy (EIS) measurements were performed over a frequency range of  $10^5$  to  $10^{-2} \text{ Hz}$  with a sinusoidal voltage amplitude of 5 mV. Chronopotentiometric curves were recorded for 86 h continuously at a constant current density without iR-compensation. Electrochemical active surface areas (ECSA) were determined from double-layer capacitances ( $C_{\text{dl}}$ ), according to the formula:  $\text{ECSA} = C_{\text{dl}}/C_s$ , where  $C_s$ , the specific capacitance, was assumed to be  $0.04 \text{ mF cm}^{-2}$  in the alkaline solution.  $C_{\text{dl}}$  was measured through cyclic voltammetry in the non-faradic potential region at scan rates of 30, 60, 90, 120, 150 and  $180 \text{ mV s}^{-1}$ , respectively. The  $\Delta j$  ( $j_{\text{anode}} - j_{\text{cathode}}$ ) was calculated at  $0.892 \text{ V}$  vs RHE for each scan rate, and the resulting  $\Delta j/2$  was plotted against scan rates. The slope of the resulting line was used to determine  $C_{\text{dl}}$ .

### 1.8 Product Analysis.

The products of ethylene glycol oxidation reaction (EGOR) obtained from the alkaline electrolyte were detected by high-performance liquid chromatography (HPLC, DGU-20A3R, Shimadzu) equipped with an Xtimate Sugar-H column ( $300 \times 7.8 \times 5 \mu\text{m}$ ) and a UV detector operating at 210 nm. The column was maintained at a temperature of  $35 \text{ }^\circ\text{C}$ . A 5 mM aqueous solution of  $\text{H}_2\text{SO}_4$  was used as the mobile phase with a flow rate of  $0.6 \text{ mL/min}$ . Specifically, the electrolyte was collected and diluted twice with a 5 mM  $\text{H}_2\text{SO}_4$  aqueous solution. A  $10 \mu\text{L}$  sampling loop was used. The Faraday efficiency (FE) of oxidation products was calculated using the following equation (1):

$$\text{The Faraday efficiency (\%)} = \frac{n \times F \times \text{moles of product}}{\text{total charge}} \quad (1)$$

where F is the Faraday constant (96485 C mol<sup>-1</sup>) and n is the number of electrons involved in the formation of each product from ethylene glycol (for example, n = 3 for formic acid) according to the following equation (2).

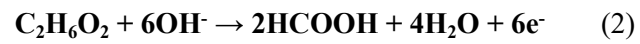

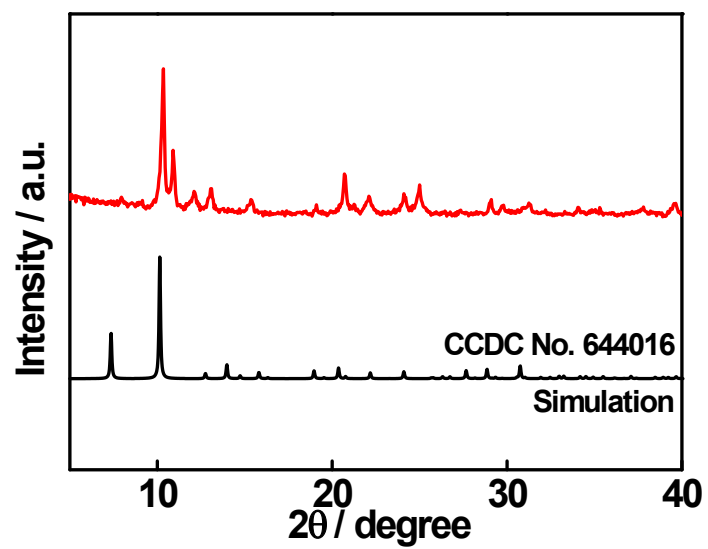

**Figure S1.** XRD pattern of the as-synthesized MIL-88(A) (red plot).

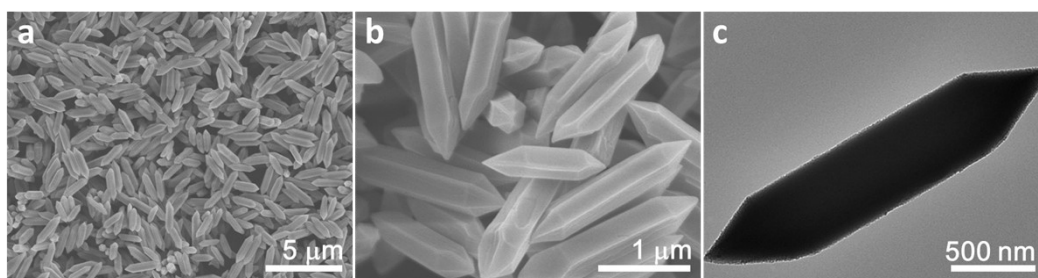

**Figure S2.** (a) Low-magnification and (b) high-magnification FE-SEM images and (c) TEM image of MIL-88(A).

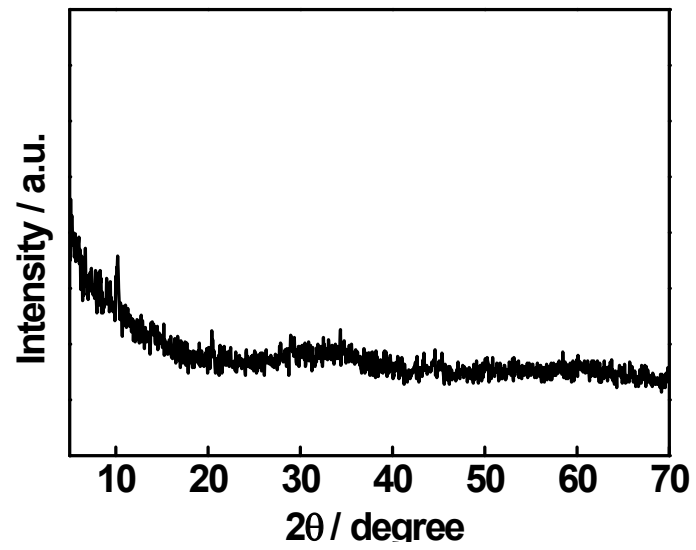

**Figure S3.** XRD pattern of the as-prepared a-Fe-O-P

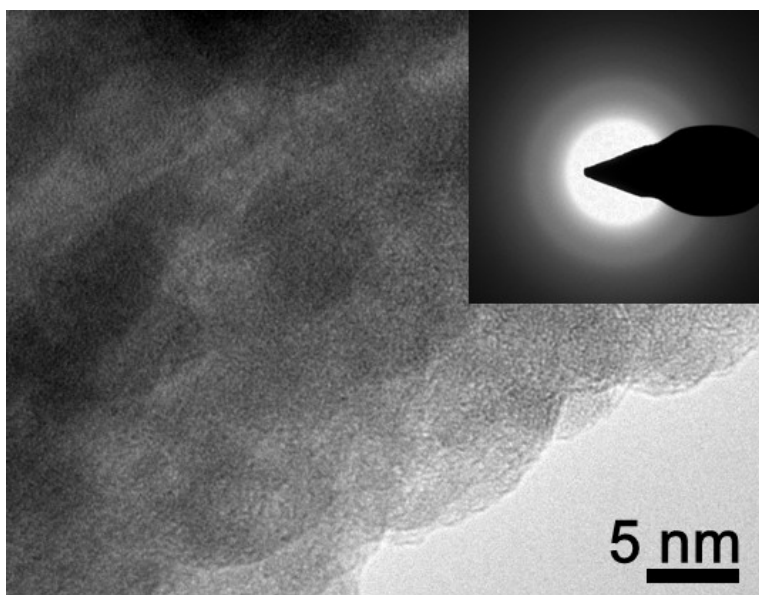

**Figure S4.** HRTEM image of a-Fe-O-P. Inset is corresponding SAED pattern.



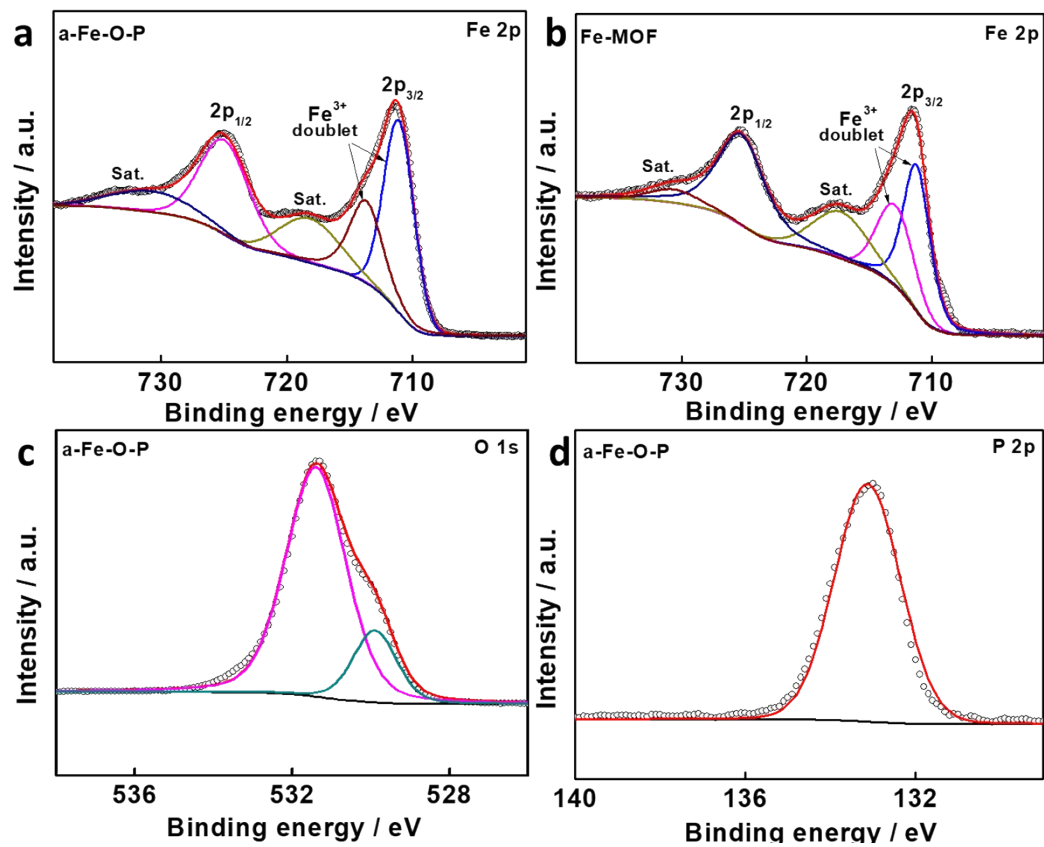

**Figure S5.** High-resolution XPS spectra of Fe 2p of (a) a-Fe-O-P and (b) Fe-MOF, (c) O 1s and (d) P 2p of a-Fe-O-P.

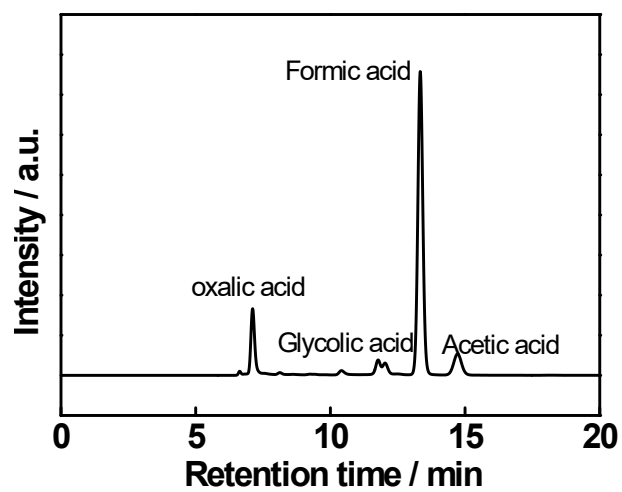

**Figure S6.** HPLC spectrum of anodic products in the KOH-EG mixed solution after continuous electrocatalysis for 12 h.

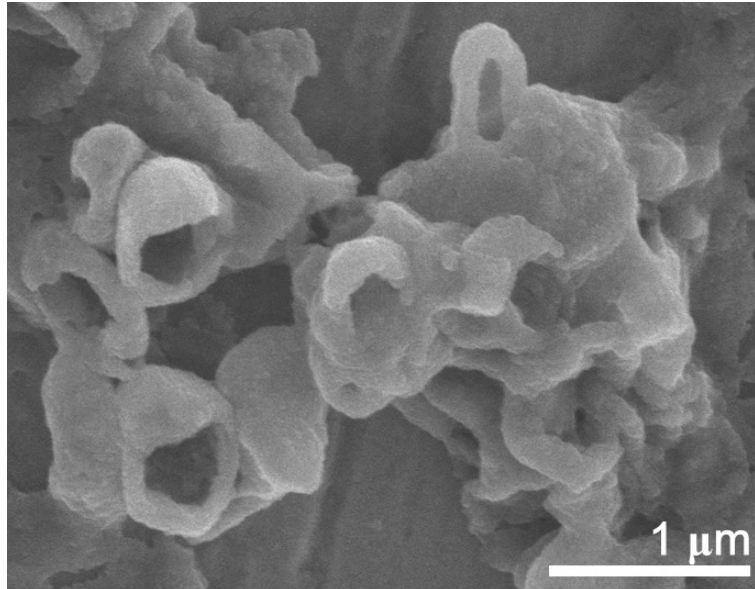

**Figure S7.** SEM image of a-Fe-O-P after durability test in the KOH-EG electrolyte over 36 h.

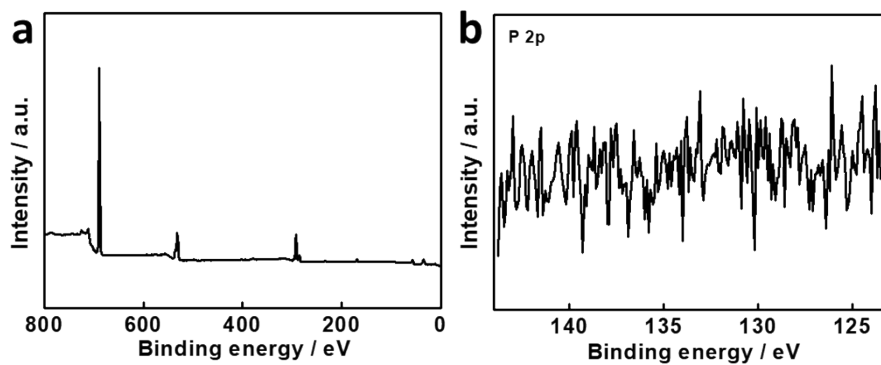

**Figure S8.** (a) A survey XPS spectrum of a-Fe-O-P after durability test in the KOH-EG electrolyte over 36 h and (b) high-resolution P 2p XPS spectrum.

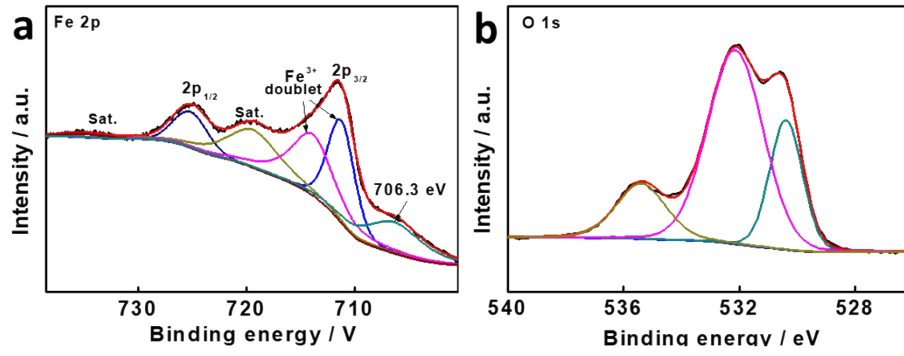

**Figure S9.** High-resolution XPS spectra of (a) Fe 2p and (b) O 1s of a-Fe-O-P after durability test.

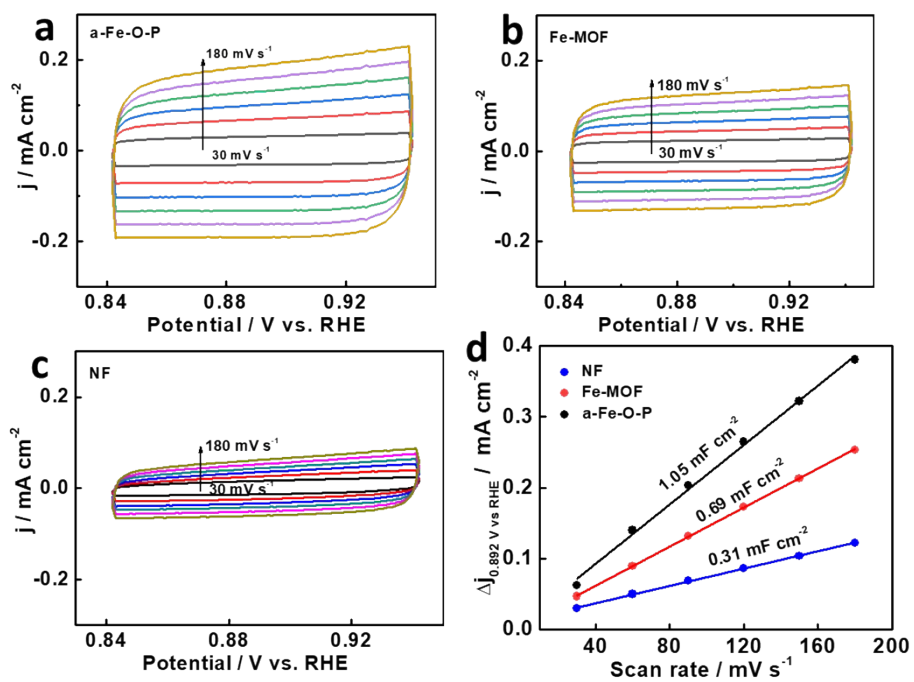

**Figure S10.** CV curves for various working electrodes of (a) a-Fe-O-P, (b) Fe-MOF, and (c) NF recorded within the potential window of 0.842–0.942 V vs. RHE at different scan rates; (d) the capacitive current densities of electrodes plotted as a function of scan rates from CV curves at 0.892 V vs RHE.

**Table S1.** Comparison of the electrocatalytic performance of various reported OER electrocatalysts in 1.0 M KOH solution.

| Electrocatalysts                                                | Substrate     | Current Density / mA cm <sup>-2</sup> | Overpotential / mV | Stability / h | Ref.      |
|-----------------------------------------------------------------|---------------|---------------------------------------|--------------------|---------------|-----------|
| a-Fe-O-P                                                        | Ni foam       | 10                                    | 271                | 86            | This work |
|                                                                 |               | 50                                    | 304                |               |           |
|                                                                 |               | 100                                   | 326                |               |           |
|                                                                 |               | 200                                   | 338                |               |           |
| FePO <sub>4</sub> nanosheets                                    | Ni foam       | 10                                    | 310                | 15            | 1         |
|                                                                 |               | 100                                   | 490                |               |           |
| FeP-FeP <sub>x</sub> O <sub>y</sub>                             | Glassy carbon | 10                                    | 280                | 42            | 2         |
| V-Fe <sub>2</sub> /FePO <sub>4</sub>                            | Ni foam       | 10                                    | 270                | 24            | 3         |
| CoFe-P                                                          | Glassy carbon | 10                                    | 293                | 30            | 4         |
| CoFe@PN-CF                                                      | Glassy carbon | 10                                    | 320                | 20            | 5         |
|                                                                 |               | 100                                   | 400                |               |           |
| Ni <sub>0.75</sub> Fe <sub>0.25</sub> -P/PO <sub>3</sub> @fCNTs | Glassy carbon | 10                                    | 290                | 200           | 6         |
| NixFe <sub>1-x</sub> P                                          | Ni foam       | 100                                   | 340                | 25            | 7         |
| amorphous FeCo-PO <sub>x</sub>                                  | Carbon paper  | 10                                    | 270                | 100           | 8         |
| CoPO                                                            | Ni foam       | 10                                    | 290                | 10            | 9         |
|                                                                 |               | 200                                   | 750                |               |           |
| NiCoPO/NC nanosheets                                            | Glassy carbon | 10                                    | 300                | 10            | 10        |

## Reference

1. L. Yang, Z. Guo, J. Huang, Y. Xi, R. Gao, G. Su, W. Wang, L. Cao and B. Dong, *Adv. Mater.*, **29**, 1704574
2. J. Xu, D. Xiong, I. Amorim and L. Liu, *ACS Appl. Nano Mater.*, 2018, **1**, 617-624.
3. P. Ngo, T. Nguyen, M. Singh, R. Balaji, N. Kim and J. Lee, *Appl. Catal., B*, 2023, **331**, 122674.
4. P. Li, W. Li, R. Chen and Y. Lin, *ACS Sustain. Chem. Eng.*, 2020, **8**, 9206-9216.
5. G. Gebreslase, D. Sebastián, M. Martínez-Huerta, T. Tsoncheva, B. Tsyntsarski, G. Georgiev and M. Lázaro. *Catal. Today.*, 2023, **423**, 113991.
6. C. Huang, Y. Zou, Y. Ye, T. Ouyang, K. Xiao and Z. Liu, *Chem. Commun.*, 2019, **55**, 7687-7690.
7. Q. Han, Y. Luo, J. Li, X. Du, S. Sun, Y. Wang, G. Liu and Z. Chen, *Appl. Catal. B Environ.*, 2022, **304**, 120937.
8. X. Liu, H. Yin, S. Zhang, M. Huang, T. Isimjan, X. Yang, D. Cai, *J. Colloid Interface Sci.*,

2024, **653**, 1379-1387

9. G. Anandhababu, Y. Huang, D. Babu, M. Wu and Y. Wang, *Adv. Funct. Mater.*, 2018, **28**, 1706120.
10. C. Wang, W. Chen, D. Yuan, S. Qian, D. Cai, J. Jiang and S. Zhang, *Nano Energy*, 2020, **69**, 104453,
